# Supplementary material for: Boosting Performance of Self-Polarized Fully Printed Piezoelectric Nanogenerators via Modulated Strength of Hydrogen Bonding Interactions
Source: Nanomaterials (Basel). 2021 Jul 25;11(8):1908. doi: 10.3390/nano11081908 (PMC8401582; doi:10.3390/nano11081908)
Supplement: Supplementary file 1 [file nanomaterials-11-01908-s001.zip › nanomaterials-1285921-supplementary.pdf]

## Supplementary Information

# Boosting Performance of Self-Polarized Fully Printed Piezoelectric Nanogenerators via Modulated Strength of Hydrogen Bonding Interactions

Hai Li and Sooman Lim \*

Department of Flexible and Printable Electronics, LANL-JBNU Engineering Institute, Jeonbuk National University, Jeonju 54896, Korea; lihai@jbnu.ac.kr

\* Correspondence: smlim@jbnu.ac.kr

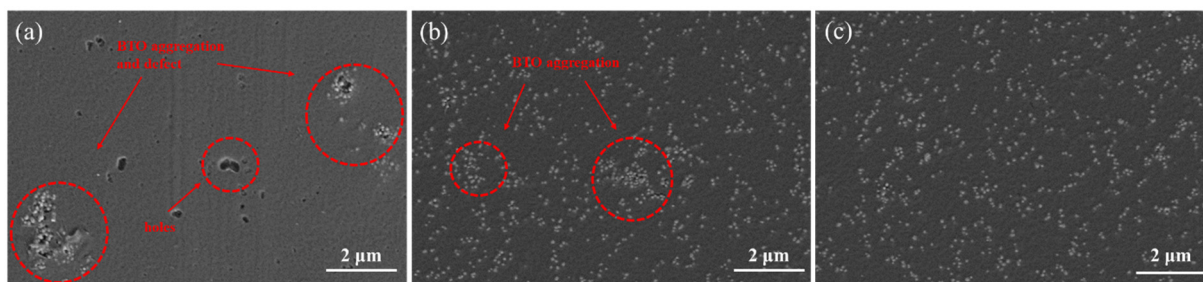

Figure S1. SEM images of the surfaces of the as-printed films: (a) 20 wt% BTO/PVDF, (b) 20 wt% PDA-BTO/PVDF and (c) 20 wt% PFD-BTO/PVDF.

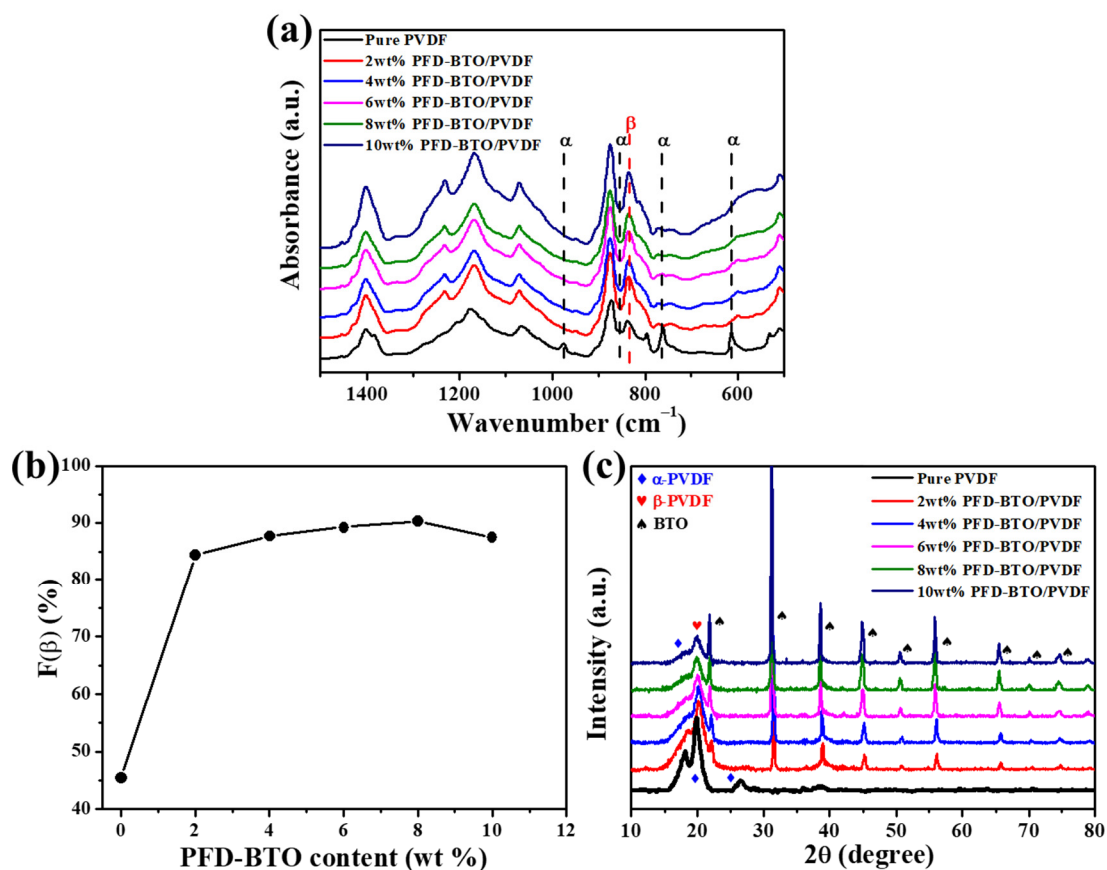

Figure S2. (a) FT-IR spectra of the printed PVDF films with various PFD-BTO nanoparticle contents, (b) The F(β) value variation in the printed samples as a function of the or PFD-BTO nanoparticle content and (c) XRD pattern of the printed PVDF films with various PFD-BTO nanoparticles contents.

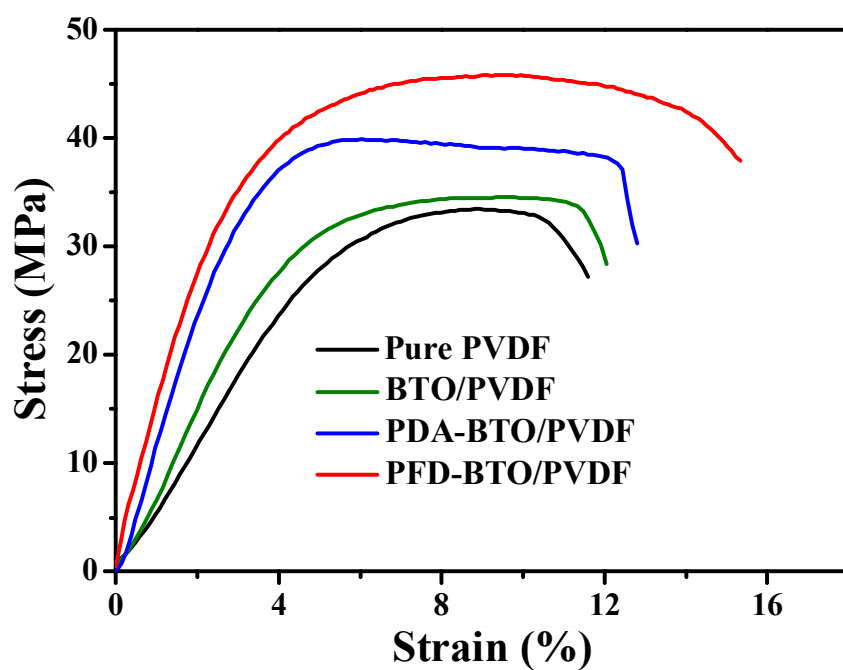

Figure S3. Stress–strain curves of the pure PVDF, BTO/PVDF, PDA-BTO/PVDF and PFD-BTO/PVDF films.

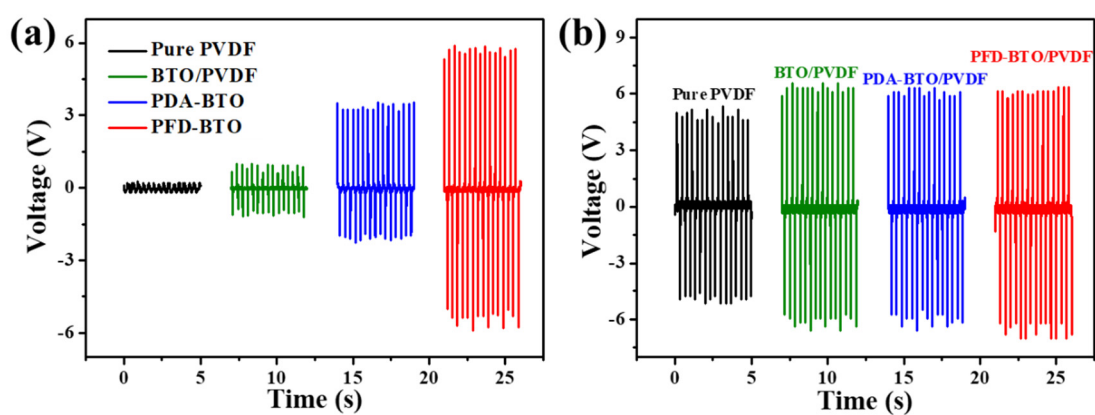

Figure S4. Output voltage output of the pure PVDF, BTO/PVDF, PDA-BTO/PVDF and PFD-BTO/PVDF based PENGs without (a) and with (b) electric poling

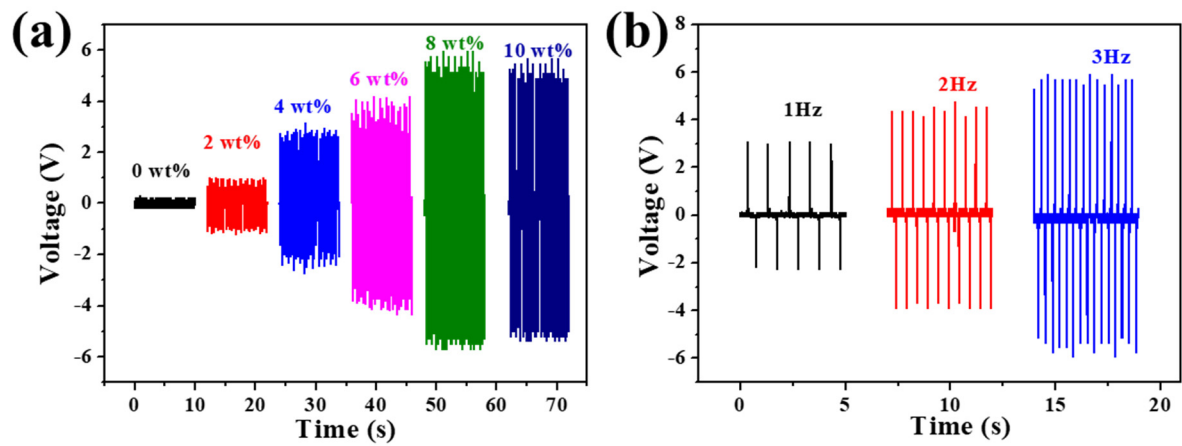

Figure S5. (a) Output Voltages of the printed PVDF films with different contents of PFD-BTO nanoparticles with a frequency of 3 Hz and a compress force of 100 N and (b) Output voltages of the 8 wt% PFD-BTO/PVDF based PENGs at different impacting frequencies under a constant pressure force of 100 N.

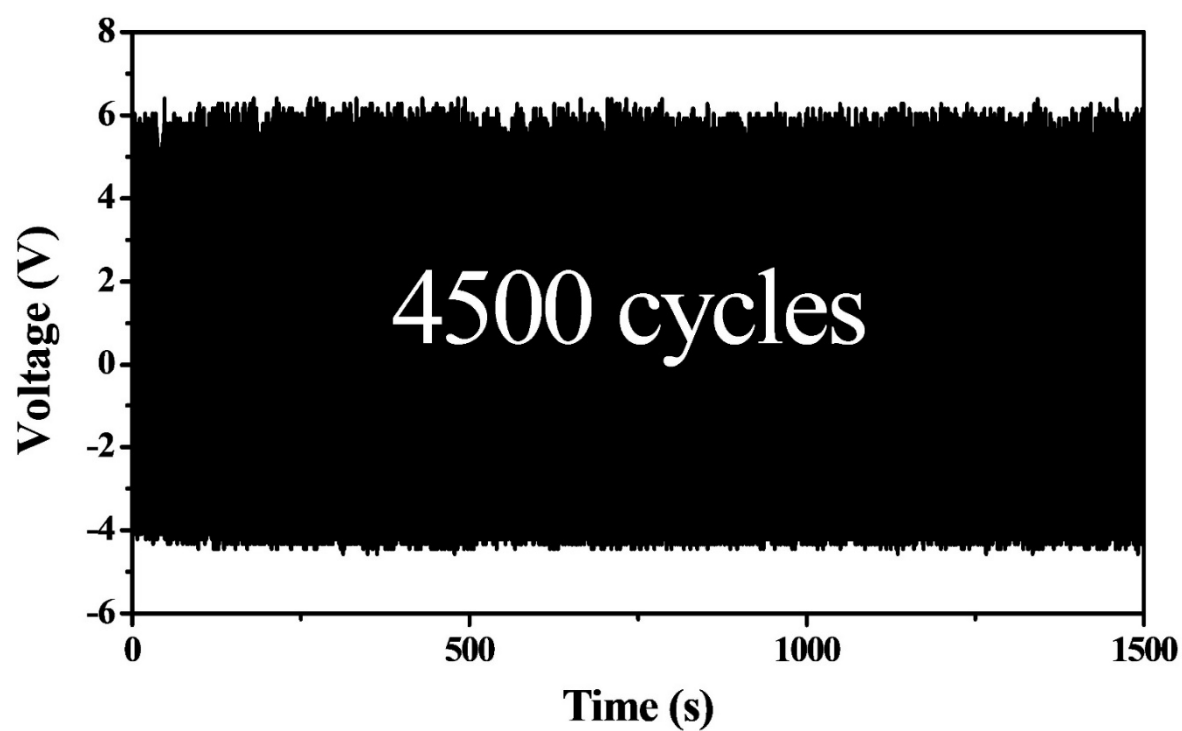

Figure S6. Output voltages of the PFD-BTO/PVDF based PENGs after one month under repeated impact force conditions for 4500 cycles with a frequency of 3 Hz and a pressure of 500 kPa.

Table S1. Summary of PVDF-based materials in our study and other reported studies.

| Material                     | Poling process | Output<br>voltage | Ref.      |
|------------------------------|----------------|-------------------|-----------|
| PDA@BTO/PVDF-TrFE            | Yes            | 6V                | 1         |
| BTO/PVDF                     | Yes            | 6V                | 2         |
| GAg/PVDF                     | None           | 0.1V              | 3         |
| SWCNTs/PVDF-TrFE             | None           | 1.2V              | 4         |
| Fe-RGO/PVDF                  | None           | 5.1V              | 5         |
| RGO/PVDF-TrFE                | None           | 2.4V              | 6         |
| dabcoHReO <sub>4</sub> /PVDF | None           | 3.8V              | 7         |
| PFD-BTO/PVDF                 | None           | 5.9V              | This work |

## References

- [1]. Guan, X.; Xu, B.; Gong, J. Hierarchically architected polydopamine modified BaTiO<sub>3</sub>@ P (VDF-TrFE) nanocomposite fiber mats for flexible piezoelectric nanogenerators and self-powered sensors. *Nano Energy*, **2020**, *70*, 104516.
- [2]. Zhou, X.; Parida, K.; Halevi, O.; Liu, Y.; Xiong, J.; Magdassi, S.; Lee, P.S. All 3D-printed stretchable piezoelectric nanogenerator with non-protruding kirigami structure. *Nano Energy*, **2020**, *72*, 104676.
- [3]. Sinha, T.K.; Ghosh, S.K.; Maiti, R.; Jana, S.; Adhikari, B.; Mandal, D.; Ray, S.K. Graphene-silver-induced self-polarized PVDF-based flexible plasmonic nanogenerator toward the realization for new class of self powered optical sensor. *ACS applied materials & interfaces*, **2016**, *8*(24), 14986–14993.
- [4]. Shepelin, N.A.; Sherrell, P.C.; Goudeli, E.; Skountzos, E.N.; Lussini, V.C.; Dicinoski, G.W.; Ellis, A.V. Printed recyclable and self-poled polymer piezoelectric generators through single-walled carbon nanotube templating. *Energy & Environmental Science*, **2020**, *13*(3), 868–883.
- [5]. Karan, S.K.; Mandal, D.; Khatua, B.B. Self-powered flexible Fe-doped RGO/PVDF nanocomposite: an excellent material for a piezoelectric energy harvester. *Nanoscale*, **2015**, *7*(24), 10655–10666.
- [6]. Habibur, R.M.; Yaqoob, U.; Muhammad, S.; Uddin, A.I. Kim, H.C. The effect of RGO on dielectric and energy harvesting properties of P (VDF-TrFE) matrix by optimizing electroactive  $\beta$  phase without traditional polling process. *Materials Chemistry and Physics*, **2018**, *215*, 46–55.

- [7]. Li, Q.; Ke, W.; Chang, T.; Hu, Z. A molecular ferroelectrics induced electroactive  $\beta$ -phase in solution processed PVDF films for flexible piezoelectric sensors. *Journal of Materials Chemistry C*, **2019**, 7(6), 1532–1543.
